# Supplementary material for: Associations between SNPs and vegetation indices: unraveling molecular insights for enhanced cultivation of tea plant (Camellia sinensis (L.) O. Kuntze)
Source: PeerJ journal article supplement (doi:10.7717/peerj.17689), 2024-07-18
Supplement: Supplemental_Figure_S1.pdf [file Supplemental_Figure_S1.pdf]

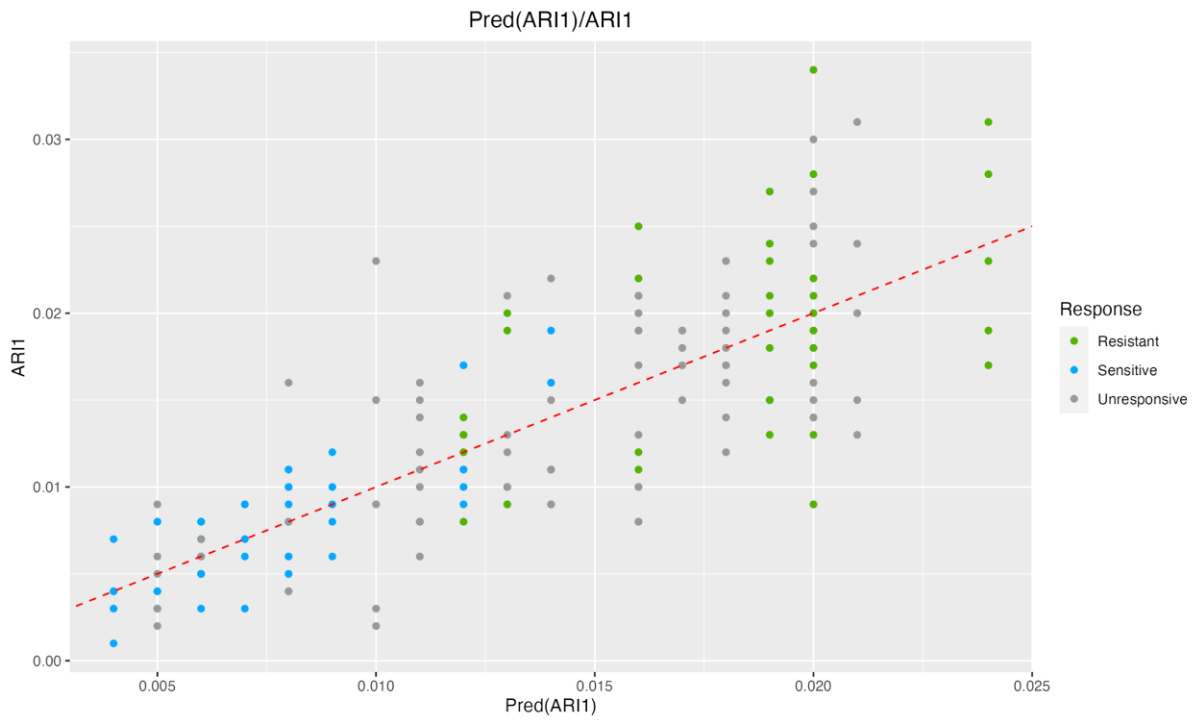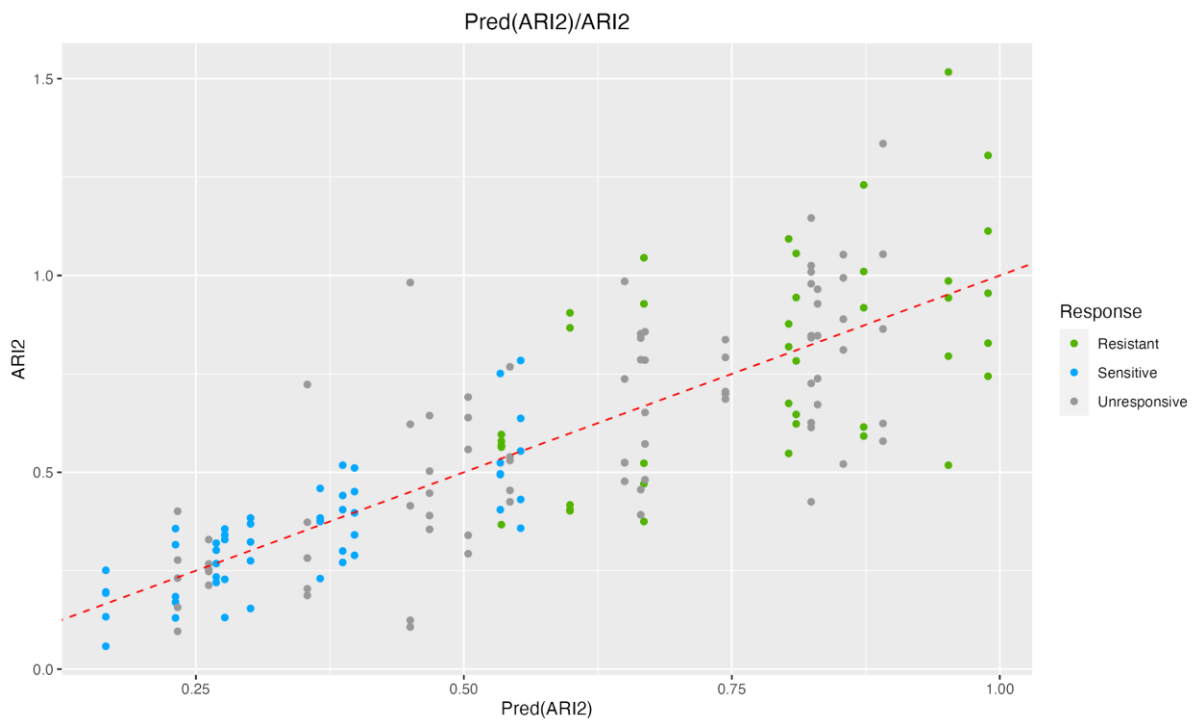

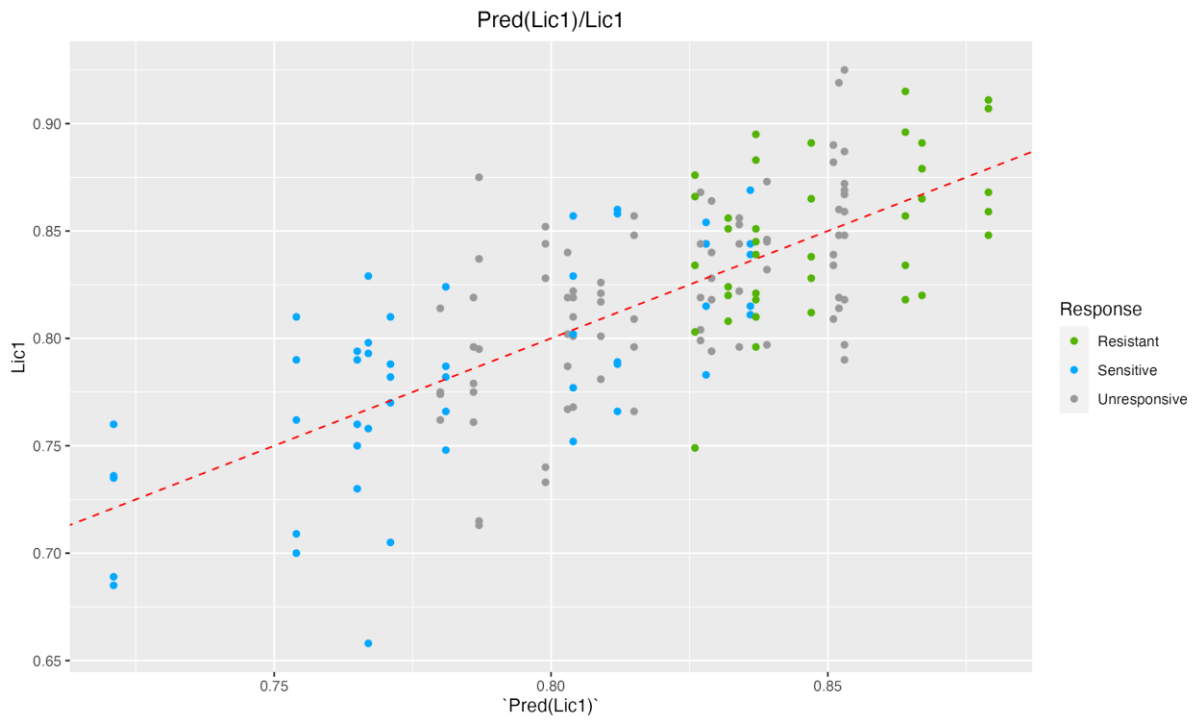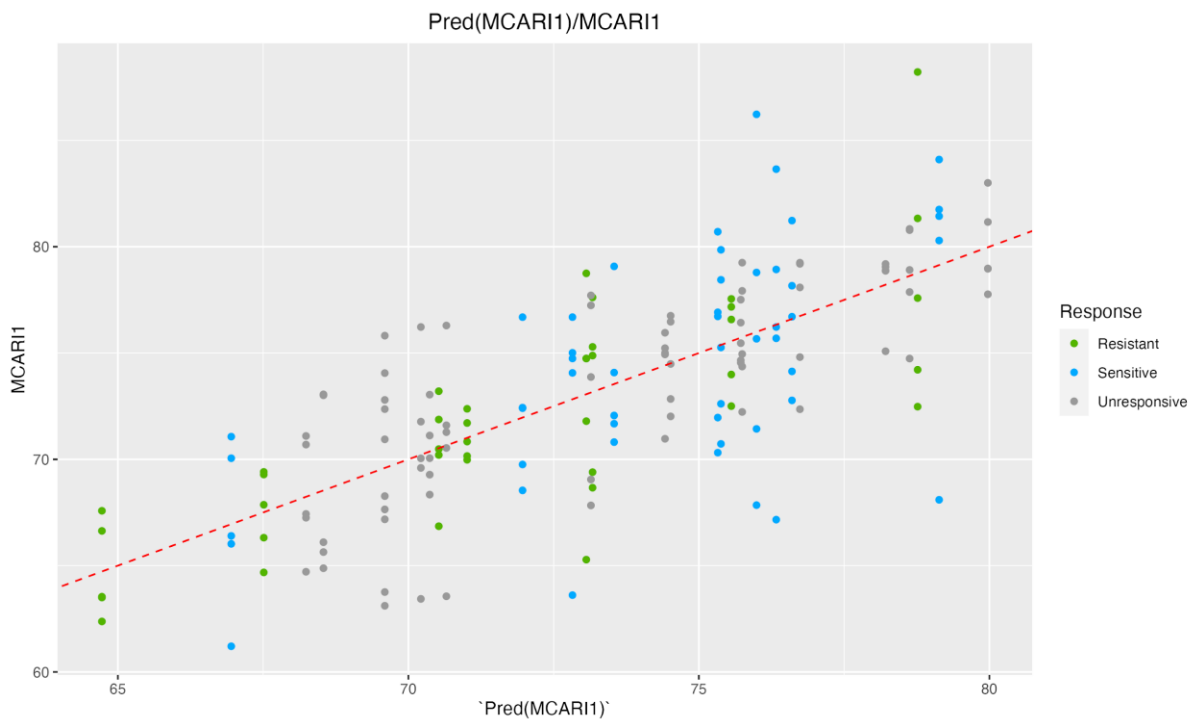

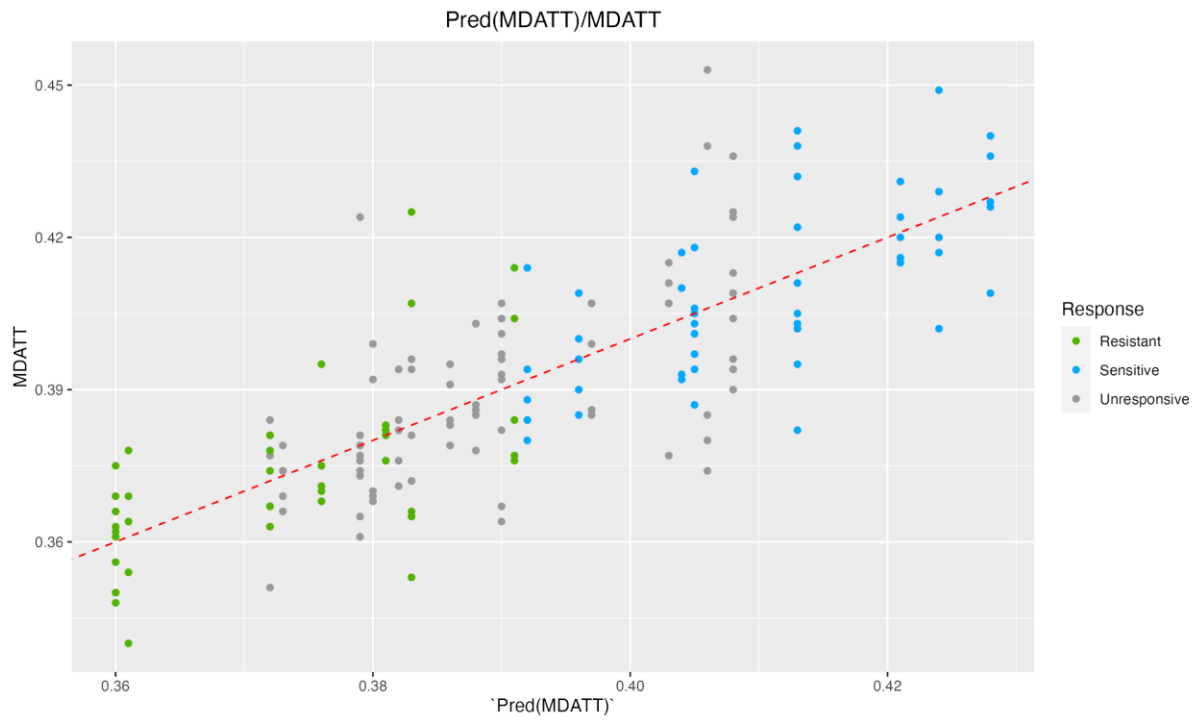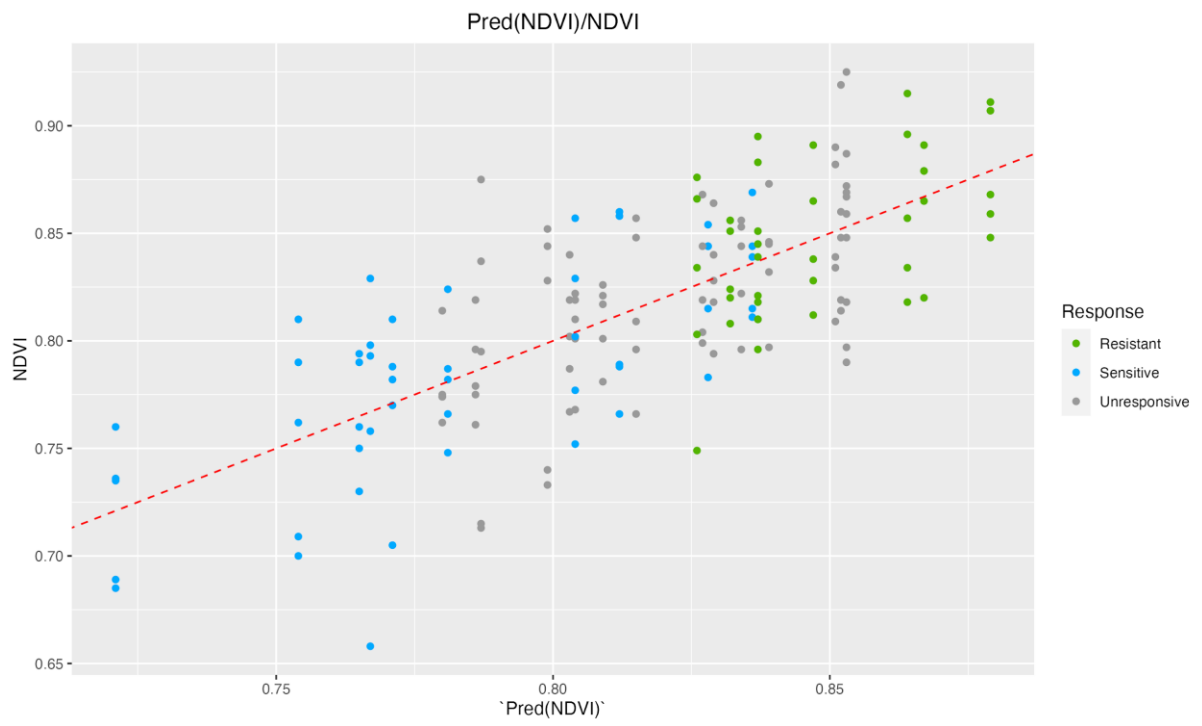

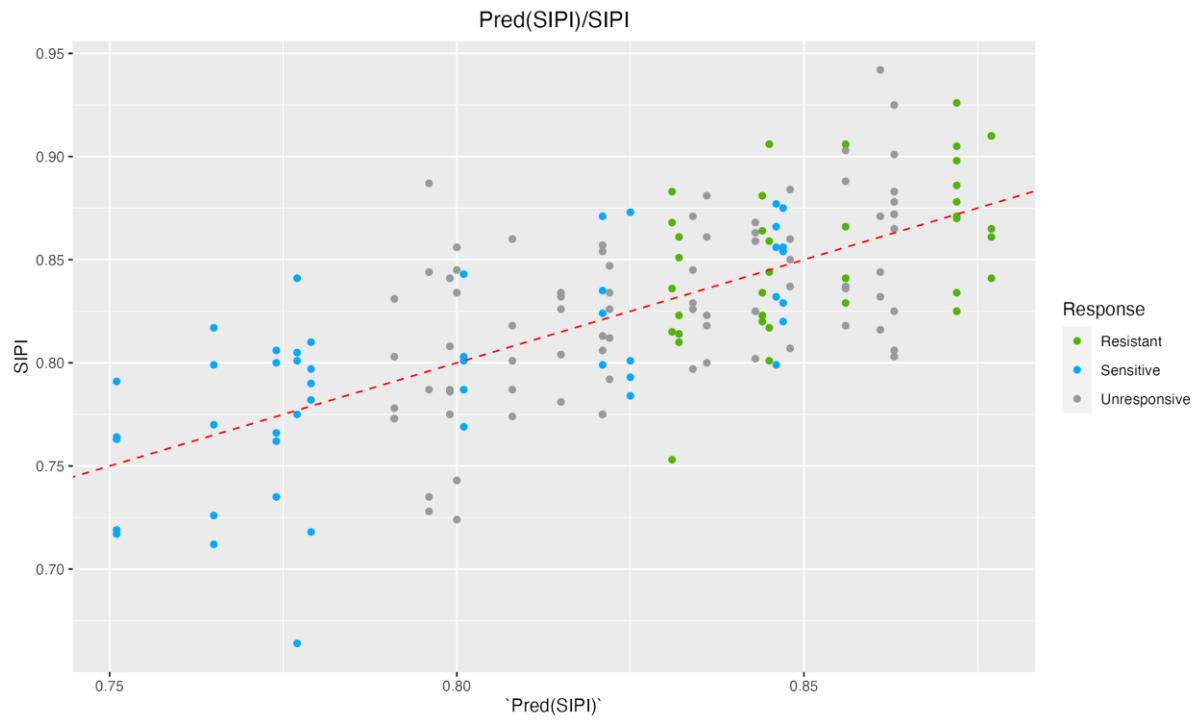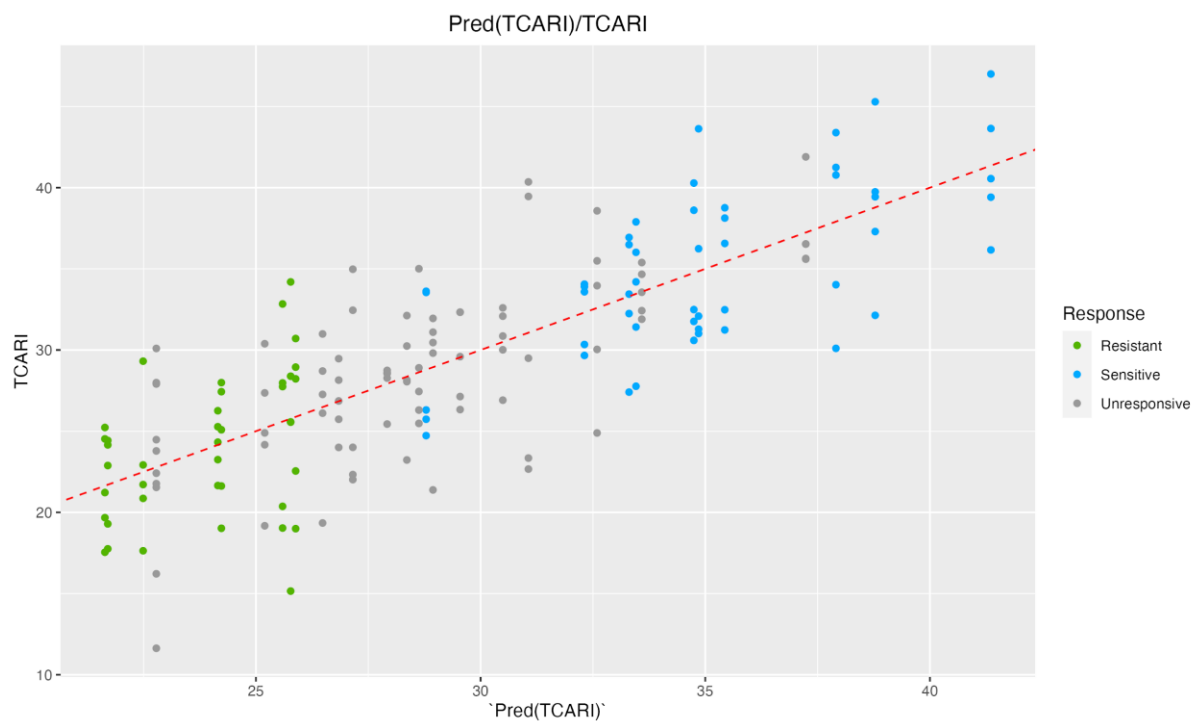

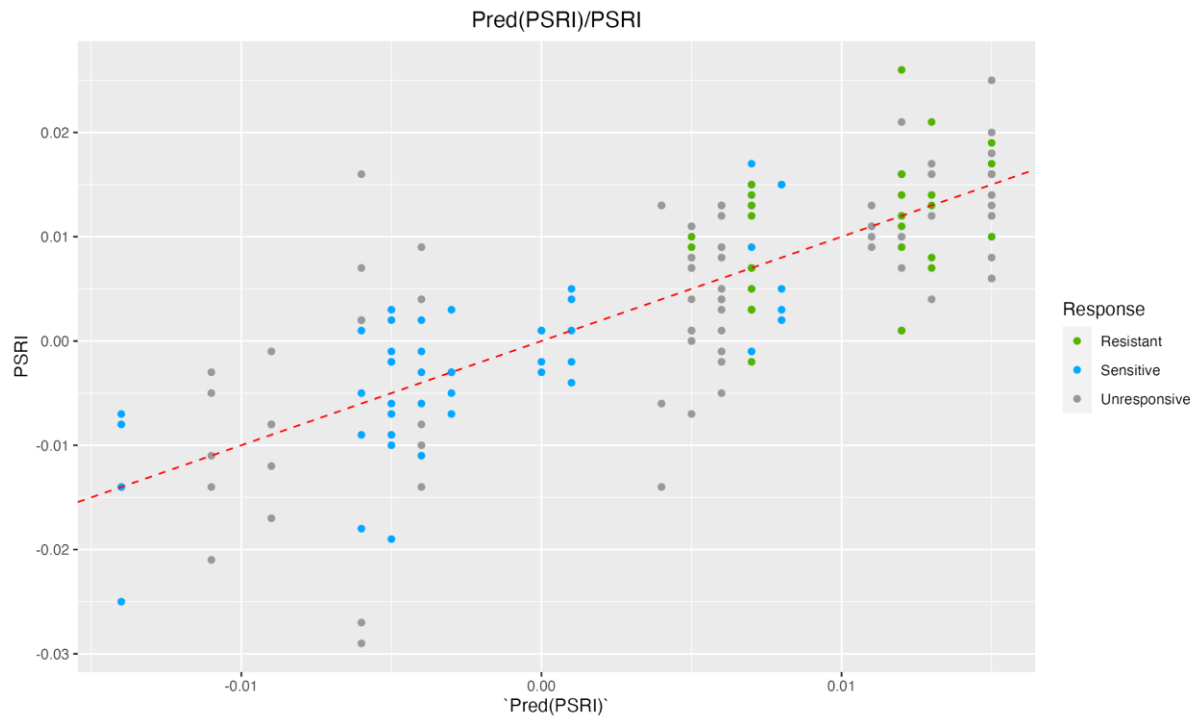

**Data points distributions and prediction in the tea genotypes with different responses to nitrogen deficit.** VIs with  $R^2 > 0.5$  and  $p$  value  $< 0.0001$  are shown. Green - tolerant genotypes; blue - susceptible genotypes; gray - non-responsive
